# Supplementary material for: Poor Oral Health Linked with Higher Risk of Alzheimer’s Disease
Source: MDPI journal article supplement (doi:10.3390/brainsci13111555), 2023-11-07
Supplement: s1 [file s1]

**Table S1.** International Codes of Diseases for Diseases of the Oral Cavity and Salivary Glands.

| ICD-CM Code              | Disease Name                                                         |
|--------------------------|----------------------------------------------------------------------|
| <b>UMLS:ICD 10CM:K00</b> | <b>Disorders of tooth development</b>                                |
| K00.0                    | Anodontia                                                            |
| K00.1                    | Supernumerary teeth                                                  |
| K00.2                    | Abnormalities of size and form of teeth                              |
| K00.3                    | Mottled teeth                                                        |
| K00.4                    | Disturbances in tooth formation                                      |
| K00.5                    | Hereditary disturbances in tooth structure, not elsewhere classified |
| K00.6                    | Disturbances in tooth eruption                                       |
| K00.7                    | Teething syndrome                                                    |
| K00.8                    | Other disorders of tooth development                                 |
| K00.9                    | Disorder of tooth development, unspecified                           |
| <b>UMLS:ICD 10CM:K01</b> | <b>Embedded and impacted teeth</b>                                   |
| K01.01                   | Embedded teeth                                                       |
| K01.02                   | Impacted teeth                                                       |
| <b>UMLS:ICD 10CM:K02</b> | <b>Dental caries</b>                                                 |
| K02.3                    | Arrested dental caries                                               |
| K02.5                    | Dental caries on pit and fissure surface                             |
| K02.6                    | Dental caries on smooth surface                                      |
| K02.7                    | Dental root caries                                                   |
| K02.9                    | Dental caries, unspecified                                           |
| <b>UMLS:ICD 10CM:K03</b> | <b>Other diseases of hard tissues of teeth</b>                       |
| K03.0                    | Excessive attrition of teeth                                         |
| K03.1                    | Abrasion of teeth                                                    |
| K03.2                    | Erosion of teeth                                                     |
| K03.3                    | Pathological resorption of teeth                                     |
| K03.4                    | Hypercementosis                                                      |
| K03.5                    | Ankylosis of teeth                                                   |
| K03.6                    | Deposits (accretions) on teeth                                       |
| K03.7                    | Postoperative color changes of dental hard tissues                   |
| K03.8                    | Other specified diseases of hard tissues of teeth                    |
| K03.9                    | Disease of hard tissues of tissues, unspecified                      |
| <b>UMLS:ICD 10CM:K04</b> | <b>Diseases of pulp and periapical tissues</b>                       |
| K04.0                    | Pulpitis                                                             |
| K04.1                    | Necrosis of pulp                                                     |
| K04.2                    | Pulp degeneration                                                    |
| K04.3                    | Abnormal hard tissue formation in pulp                               |
| K04.4                    | Acute apical periodontitis of pulpal origin                          |
| K04.5                    | Chronic apical periodontitis                                         |
| K04.6                    | Periapical abscess with sinus                                        |
| K04.7                    | Periapical abscess without sinus                                     |

|                              |                                                                       |
|------------------------------|-----------------------------------------------------------------------|
| K04.8                        | Radicular cyst                                                        |
| K04.9                        | Other and unspecified diseases of pulp and periapical tissues         |
| <b>UMLS:ICD<br/>10CM:K05</b> | <b>Gingivitis and periodontal diseases</b>                            |
| K05.0                        | Acute gingivitis                                                      |
| K05.1                        | Chronic gingivitis                                                    |
| K05.2                        | Aggressive periodontitis                                              |
| K05.3                        | Chronic periodontitis                                                 |
| K05.4                        | Periodontitis                                                         |
| K05.5                        | Other periodontal diseases                                            |
| K05.6                        | Periodontal diseases, unspecified                                     |
| <b>UMLS:ICD<br/>10CM:K06</b> | <b>Other disorders of the gingiva and edentulous alveolar ridge</b>   |
| K06.0                        | Gingival recession                                                    |
| K06.1                        | Gingival enlargement                                                  |
| K06.2                        | Gingival and edentulous alveolar ridge lesions associated with trauma |
| K06.3                        | Horizontal alveolar bone loss                                         |
| K06.8                        | Other specified disorders of gingiva and edentulous alveolar ridge    |
| K06.9                        | Disorder of gingiva and edentulous alveolar ridge, unspecified        |
| <b>UMLS:ICD<br/>10CM:K08</b> | <b>Other disorders of teeth and supporting structures</b>             |
| K08.0                        | Exfoliation of teeth due to systemic causes                           |
| K08.1                        | Complete loss of teeth                                                |
| K08.2                        | Atrophy of edentulous alveolar ridge                                  |
| K08.3                        | Retained dental root                                                  |
| K08.4                        | Partial loss of teeth                                                 |
| K08.5                        | Unsatisfactory restoration of teeth                                   |
| K08.8                        | Other specified disorders of teeth and supporting structures          |
| <b>UMLS:ICD<br/>10CM:K09</b> | <b>Cysts of oral region, not elsewhere classified</b>                 |
| K09.0                        | Developmental odontogenic cysts                                       |
| K09.1                        | Developmental (nonodontogenic) cysts of oral region                   |
| K09.8                        | Other cysts of oral region, not elsewhere classified                  |
| K09.9                        | Cyst of oral region, unspecified                                      |
| <b>UMLS:ICD<br/>10CM:K11</b> | <b>Diseases of salivary glands</b>                                    |
| K11.0                        | Atrophy of salivary gland                                             |
| K11.1                        | Hypertrophy of salivary gland                                         |
| K11.2                        | Sialoadentitis                                                        |
| K11.3                        | Abcess of salivary gland                                              |
| K11.4                        | Fistula of salivary gland                                             |
| K11.5                        | Sialolithiasis                                                        |
| K11.6                        | Mucocele of salivary gland                                            |
| K11.7                        | Disturbances of salivary secretion                                    |
| K11.8                        | Other diseases of salivary glands                                     |
| K11.9                        | Disease of salivary gland, unspecified                                |
| <b>UMLS:ICD<br/>10CM:K12</b> | <b>Stomatitis and relation lesions</b>                                |
| K12.0                        | Recruitment of oral aphthae                                           |
| K12.1                        | Other forms of stomatitis                                             |

---

|                              |                                                     |
|------------------------------|-----------------------------------------------------|
| K12.2                        | Cellulitis and abcess of mouth                      |
| K12.3                        | Oral mucositis (ulcerative)                         |
| <b>UMLS:ICD<br/>10CM:K13</b> | <b>Other diseases of lip and oral mucosa</b>        |
| K13.0                        | Diseases of lips                                    |
| K13.1                        | Cheek and lip biting                                |
| K13.2                        | Leukoplakia of oral mucosa, including tongue        |
| K13.3                        | Hairy leukoplakia                                   |
| K13.4                        | Granuloma and granuloma-like lesions of oral mucosa |
| K13.5                        | Oral submucous fibrosis                             |
| K13.6                        | Irritative hyerplasia of oral mucosa                |
| K13.7                        | Other and unspecified lesions of oral mucosa        |
| <b>UMLS:ICD<br/>10CM:K14</b> | <b>Diseases of tongue</b>                           |
| K14.0                        | Glossitis                                           |
| K14.1                        | Geographic tongue                                   |
| K14.2                        | Median rhomboid glossitis                           |
| K14.3                        | Hypertrophy of tongue papillae                      |
| K14.4                        | Atrophy of tongue papillae                          |
| K14.5                        | Plicated tongue                                     |
| K14.5                        | Glossodynia                                         |
| K14.8                        | Other diseases of tongue                            |
| K14.9                        | Other diseases of tongue, unspecified               |

These ICD identifiers have been established by the World Health Organization for the classification of medical conditions impacting the oral cavity and salivary glands.
